# Supplementary material for: Target of Rapamycin Complex 2 regulates cell growth via Myc in Drosophila
Source: PubMed Central journal article supplement (PMC4441130; doi:10.1038/srep10339), 2015-05-22
Supplement: srep10339-s1.pdf [file srep10339-s1.pdf]

# Target of Rapamycin Complex 2 regulates cell growth via Myc in *Drosophila*

Ying Kuo, Huanwei Huang, Tao Cai, and Tao Wang

**A**

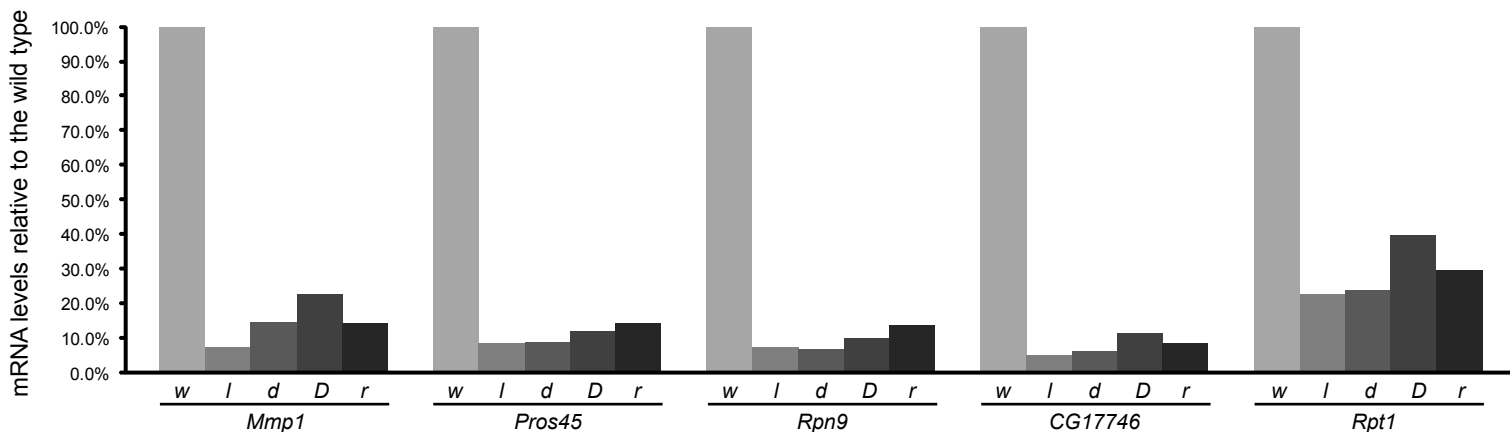

**B**

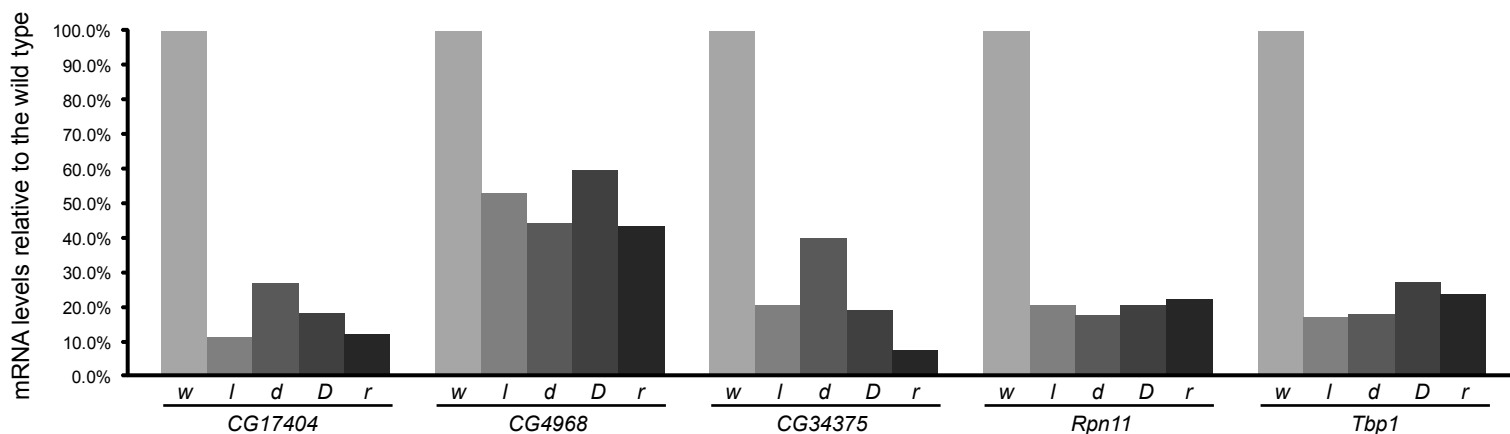

**C**

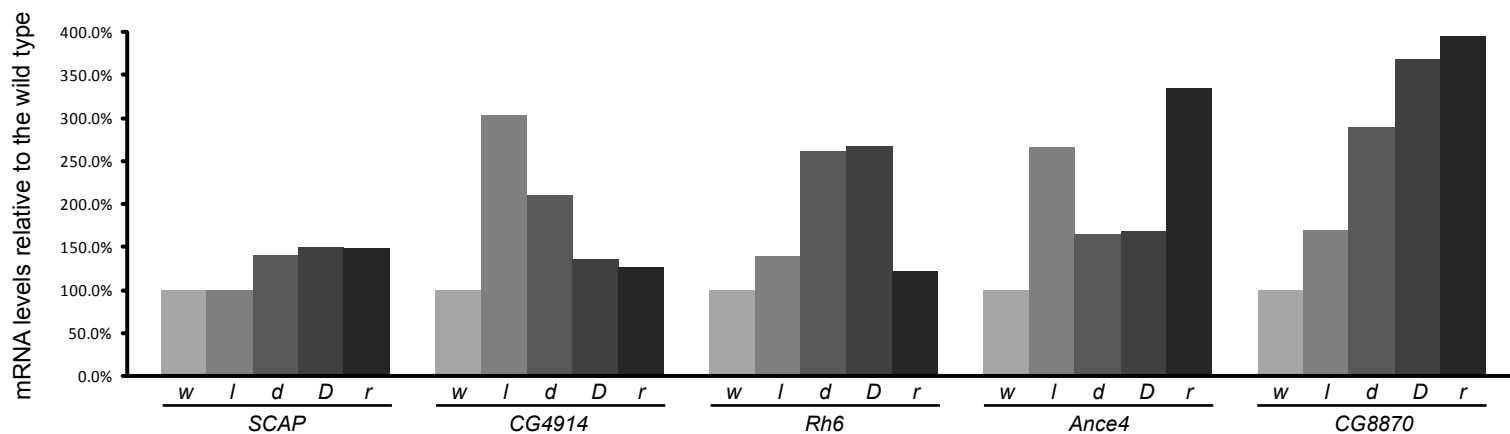

**Supplementary Figure S1. Confirmation of RNA-seq results by Quantitative PCR.** (A-C) Quantitative PCR of selected gene expression identified from the comparison of RNA-seq results. Total cDNA and mRNA were extracted and inverted from flies with genotypes of wild-type control (*w*), *lst8<sup>1</sup>* (*l*), *dm<sup>P0</sup>* (*d*), *lst8<sup>1</sup> dm<sup>P0</sup>* (*D*) and *ric<sup>1</sup>* (*r*).

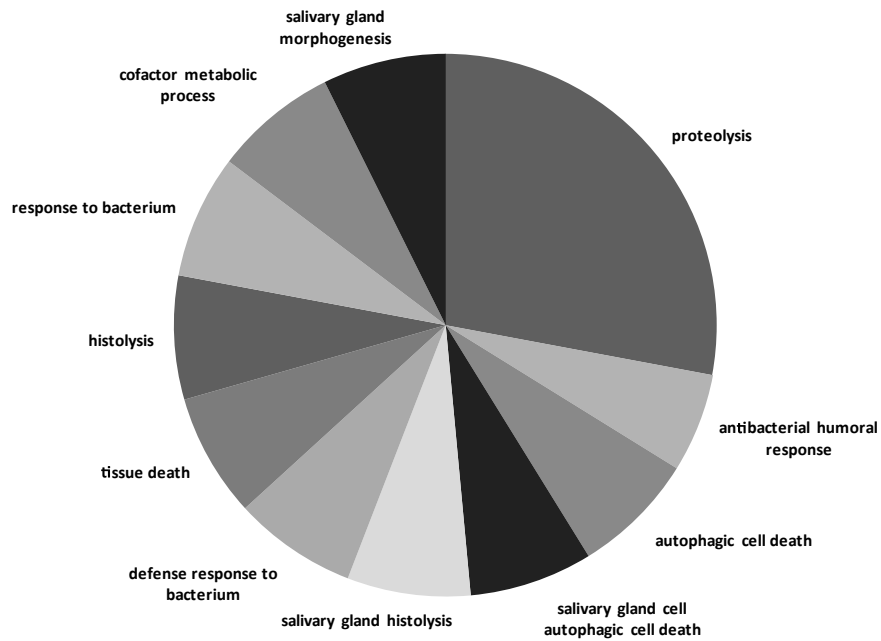

**Supplementary Figure S2. Gene ontology classification of the 214 genes affected by the *Ist81* and *Ist81 dm<sup>P0</sup>* mutations but not by *dm<sup>P0</sup>* mutations.**

**A**

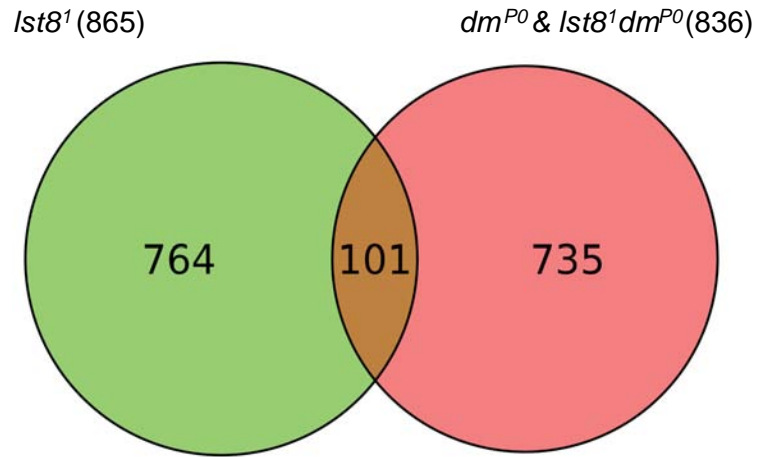

**B**

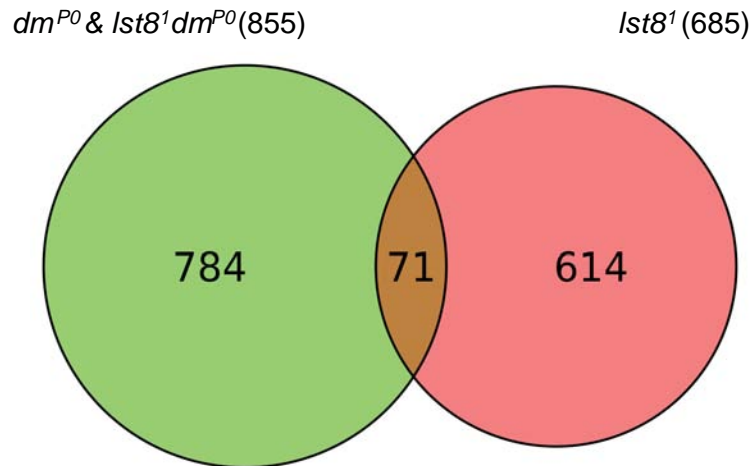

**Supplementary Figure S3. Venn diagrams comparing of downregulated (A) and upregulated (B) genes between *Ist81* versus control and *Ist81 dm<sup>P0</sup>* versus *dm<sup>P0</sup>*.**
